# Supplementary material for: Serosurvey of Immunity to Monkeypox (Mpox) Virus Antigens in People Living with HIV in South Florida
Source: MDPI journal article supplement (doi:10.3390/pathogens12111355), 2023-11-15
Supplement: s1 [file s1]

**Multinomial logistic regression results:**

| <b>MPXV Antibody Positivity</b> | <b>Intercept</b> | <b>HIV Status (HIV Positive)</b> | <b>Age</b> | <b>Male Gender</b> |
|---------------------------------|------------------|----------------------------------|------------|--------------------|
| = 1 antibody positive           | -3.374625        | -0.5882291                       | 0.04643884 | -1.138332          |
| ≥2 antibodies positive          | -6.765861        | 0.6802219                        | 0.04242784 | 1.742656           |

**P-values for variables:**

| <b>MPXV Antibody Positivity</b> | <b>Intercept</b> | <b>HIV Status (HIV Positive)</b> | <b>Age</b>  | <b>Male Gender</b> |
|---------------------------------|------------------|----------------------------------|-------------|--------------------|
| = 1 antibody positive           | 0.0001647653     | 0.1785819                        | 0.003593848 | 0.01043478         |
| ≥2 antibodies positive          | 0.0001193892     | 0.3354981                        | 0.089172560 | 0.10321792         |
